# Supplementary material
Source: Research Square preprint supplement (doi:10.21203/rs.3.rs-8816356/v1)
Supplement: Supplementary file 1 [file bae284d843ab855a44cc2225.docx]

Supplementary Appendix:

1. Climate and Health Education Survey - Climate Elective
2. Climate and Health Education Survey - Community Strengths and Needs Assessment

*Climate and Health Education Survey - Climate Elective*

Name:

Gender:

Race:

Year (MS1, MS2, MS3, CDYO, MS4)

**Attitudes and Perceptions**

1. [Matrix] How much do you think climate change will harm … *(1- Strongly Disagree to 6 - Strongly agree).*

You personally

Your patients

People in your country

Future generations of people

*2. [Matrix] For the below questions respond with your level of agreement to the statement. (1- Strongly Disagree to 6 - Strongly agree)*

I feel knowledgeable about the relationship between climate change and health.

Climate change has negatively impacted people in my city and/or county over the past decade.

Climate change is relevant to providing direct patient care.

The healthcare system does not significantly contribute to climate change.

The Penn hospital system is well prepared for climate-related events (eg. disasters/emergencies, extreme weather events, increase in certain diseases)

Teaching about climate change and its health impacts should be integrated into medical education.

Science and technology will eventually solve our problems with pollution, overpopulation, and diminishing resources.

I feel powerless because individual healthcare providers cannot contribute as much to energy saving efforts as industries.

**Practice**

3. [matrix] Which of the following, if any, are barriers that prevent you from addressing climate change-related health issues with patients (or future patients)? (1- Strongly Disagree to 6 - Strongly agree)

- 1. I do not believe that climate change is occurring
  2. My current or future patients are not interested or knowledgeable enough about climate impacts to discuss this issue
  3. Lack of time
  4. I lack the knowledge about how to discuss climate change with patients
  5. Discussing climate change with patients will not significantly impact their overall health
  6. This is not a billable activity
  7. Other barriers (please specify)

4. [matrix] For the below questions respond with your level of agreement to the statement. (1- Strongly Disagree to 6 - Strongly agree)

I believe my actions, both personal and professional, can contribute to effective action on climate change.

I can see myself joining a climate focused organization.

Counseling patients on sustainable lifestyle choices is an important responsibility for physicians.

Physicians should inform the general public about climate change.

I feel confident discussing the connection between climate change and health during patient interviews.

As a future physician, I believe I can contribute to the sustainable design of the health sector.

I feel confident advocating for climate change interventions in my community to protect the health of my future patients

I feel confident on how to reduce my climate impact in the hospital setting (eg. sorting medical waste appropriately)

Health professionals have a responsibility to bring the health effects of climate change to the attention of the public.

Health professionals have a responsibility to bring the health effects of climate change to the attention of policy makers.

My professional society should offer virtual options for meetings and conferences to reduce travel-related emissions.

It is important to me that my future employer pays attention to the environmental performance of its company/institution

**Knowledge**

*Please complete the below multiple choice questions to the best of your ability.*

To what extent do you agree or disagree that people are currently being affected by the following health issues related to climate change? (1- Strongly Disagree to 6 - Strongly agree)

Heat-related health effects (e.g., heatstroke, heat exhaustion, cardio-respiratory illness)

Vector Borne infection (e.g. Lyme, West Nile, Dengue Fever, Malaria)

Food/waterborne illnesses following heavy rainfall or floods ( e.g. Salmonella, Giardia, Cryptosporidium)

Injuries due to severe storms, floods, droughts, or wildfires

Air pollution related worsening of illnesses (e.g., asthma, COPD, pneumonia, cardiovascular disease)

Increased allergic reactions or asthma due to exposure to plants or mold (e.g visits to office/ER for asthma/allergic symptoms)

Mental health problems related to climate change events

4. How do you appropriately dispose of gauze with emesis and saliva on it from removing an NG tube at bedside when the patient is NOT in isolation?

- 1. Municipal waste (white/gray bin)
  2. Sharps container
  3. Regulated medical waste (red bin)
  4. Either municipal waste (white/gray bin) or regulated medical waste (red bin)

7. How do you appropriately dispose of gauze with blood on it from a wound change when the patient is NOT in isolation?

- 1. Municipal waste (white/gray bin)
  2. Sharps container
  3. Regulated medical waste (red bin)
  4. Either municipal waste (white/gray bin) or regulated medical waste (red bin)

8. Where can you find information on Philadelphia specific climate advocacy projects?

- 1. Climate Resources for Health Education
  2. Citizens Climate Lobby
  3. Medical Students for a Sustainable Future
  4. Medical Society Consortium on Climate and Health
  5. All of the above

9. How can climate change affect the frequency of West Nile virus infections?

a. Changes in weather conditions alter mosquito habitats
 b. Changes in weather conditions alter bird habitats
 c. Changes in mosquito hatching and survival rates
 d. Both A and C
 e. All of the above

10. Studies have found an association between air pollution and increased rates of which of the following?

1. All-cause mortality
2. Cardiovascular disease
3. Respiratory problems
4. All of the above

11. Which of the following strategies can help prevent heat-related illness in adolescent athletes?

1. During periods of extreme heat, outdoor athletes should stop activity to hydrate at least once every 60 minutes.
2. Coaches and athletes should monitor the heat index—instead of only looking at air temperature—to determine the relative safety of outdoor athletic activities during periods of extreme heat.
3. Conducting prolonged sports practices outside during periods of extreme heat can help athletes develop tolerance to extreme heat conditions.
4. Finishing outdoor sports practices before the air temperature reaches 92°F (33.3°C) will always prevent athletes from experiencing dangerous levels of heat-related illness risk.

**ADDITIONAL POST-COURSE QUESTIONS (not for comparison group)**

*For the below questions respond with your level of agreement to the statement. (1- Strongly Disagree to 6 - Strongly agree*

1. I would recommend the course to other students
2. The teaching materials were appropriate
3. The lectures were beneficial for my learning
4. The workshops/discussions were beneficial for my learning
5. I had sufficient prior knowledge to understand the course

*For the below lectures and workshops please rate the overall teaching and content quality from (1- Very Poor to 6 - Excellent)*

1. Pediatrics Lecture
2. Cardiology Lecture
3. Air Pollution Lecture
4. Infectious Disease Lecture
5. Reproduction Lecture
6. Healthcare Sustainability Lecture
7. Case workshops
8. Advocacy Training
9. Final Wrap-Up Activity

Please explain what you found most beneficial from participating in this elective.

Please explain how the elective course could be improved in the future.

Please explain ONE take-away (eg. patient care practice, knowledge, advocacy action item) that you will implement in your future work as a healthcare provider.

*Climate and Health Education Survey - Community Strengths and Needs Assessment*

Name:

Gender:

Race:

Year (MS1, MS2, MS3, CDYO, MS4)

**Please rate your level of engagement with activities related to climate change prior to medical school**

None

Low (eg. followed what was going on related to climate change in the news)

Medium (eg. occasionally attended climate change related events on my campus)

High (eg. was an environmental science major)

Very high (eg worked on climate change policy, led a student interest group)

**Engagement related to climate change during medical school**

None

Low (eg. follow what is going on related to climate change in the news)

Medium (eg. occasionally attend climate change related events on campus)

High (eg. attend an elective related to climate change, member of an interest group)

Very high (eg. pursuing a research project related to climate change, leading an interest group)

**Which of the following, if any, are barriers that prevent you from addressing climate change-related health issues with patients (or future patients)?**

I do not believe that climate change is occurring

My current or future patients are not interested or knowledgeable enough about climate impacts to discuss this issue

Lack of time

I lack the knowledge about how to discuss climate change with patients

Discussing climate change with patients will not significantly impact their overall health

This is not a billable activity

Other barriers (please specify)

**Which of the following resources would you make use of?**

● Required climate content in each organ block module during pre-clinical

● Training during pre-clerkship week on healthcare sustainability

● Training during pre-clerkship week on proper waste disposal

● Access to a self-guided online climate and health curriculum

● Access to a database of PSOM faculty completing research on either climate change or sustainability

● Training on talking to patients about the effects of climate change and preventative measures (eg. extreme heat)

● Training in advocacy around climate change and its health consequences

● Other

**Which of the following climate change and health topics are you most interested in learning about?**

Cancer

Cardiovascular conditions

Water and food insecurity

Health consequences of natural disasters

Health consequences of pollution

Health disparities

Heat-Related illness

Infectious Disease

Mental health

Population displacement

**Attitudes and Perceptions**

*[Matrix] For the below questions respond with your level of agreement to the statement. (1- Strongly Disagree to 6 - Strongly agree)*

- I feel knowledgeable about the relationship between climate change and health.

- Climate change has negatively impacted people in my city and/or county over the past decade.

- Climate change is relevant to providing direct patient care.

- The healthcare system does not significantly contribute to climate change.

- The Penn hospital system is well prepared for climate-related events (eg. disasters/emergencies, extreme weather events, increase in certain diseases)

- Teaching about climate change and its health impacts should be integrated into medical education.

- Science and technology will eventually solve our problems with pollution, overpopulation, and diminishing resources.

- I feel powerless because individual healthcare providers cannot contribute as much to energy saving efforts as industries.

**Practice**

[Matrix] For the below questions respond with your level of agreement to the statement. (1- Strongly Disagree to 6 - Strongly agree)

I believe my actions, both personal and professional, can contribute to effective action on climate change.

I can see myself joining a climate focused organization.

Counseling patients on sustainable lifestyle choices is an important responsibility for physicians.

I feel confident discussing the connection between climate change and health during patient interviews.

As a future physician, I believe I can contribute to the sustainable design of the health sector.

I feel confident advocating for climate change interventions in my community to protect the health of my future patients

I feel confident on how to reduce my climate impact in the hospital setting (eg. sorting medical waste appropriately)

Health professionals have a responsibility to bring the health effects of climate change to the attention of the general public.

Health professionals have a responsibility to bring the health effects of climate change to the attention of policy makers.

My professional society should offer virtual options for meetings and conferences to reduce travel-related emissions.

It is important to me that my future employer pays attention to the environmental performance of its company/institution
